# Supplementary material for: Mathematically Processed UV Spectroscopic Method for Quantification of Chlorthalidone and Azelnidipine in Bulk and Formulation: Evaluation of Greenness and Whiteness
Source: Hindawi journal article supplement (doi:10.1155/2022/4965138), 2022-05-20
Supplement: f1 [file 4965138.f1.pdf]

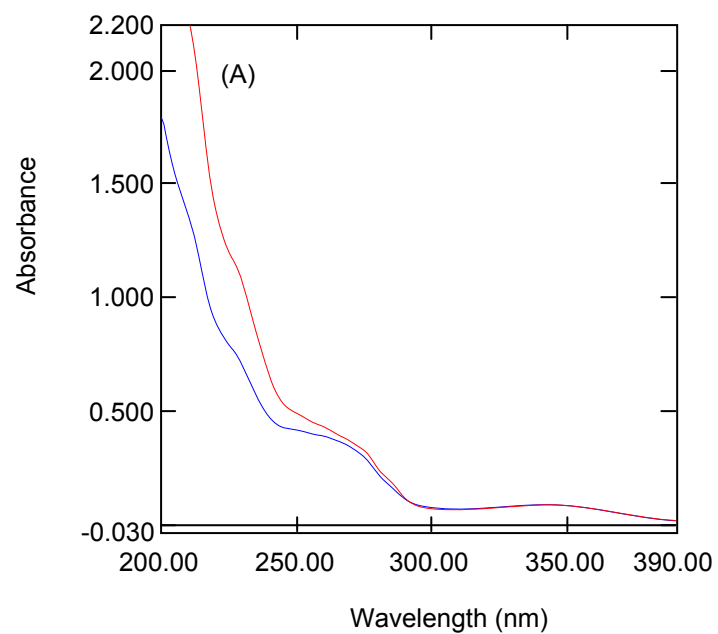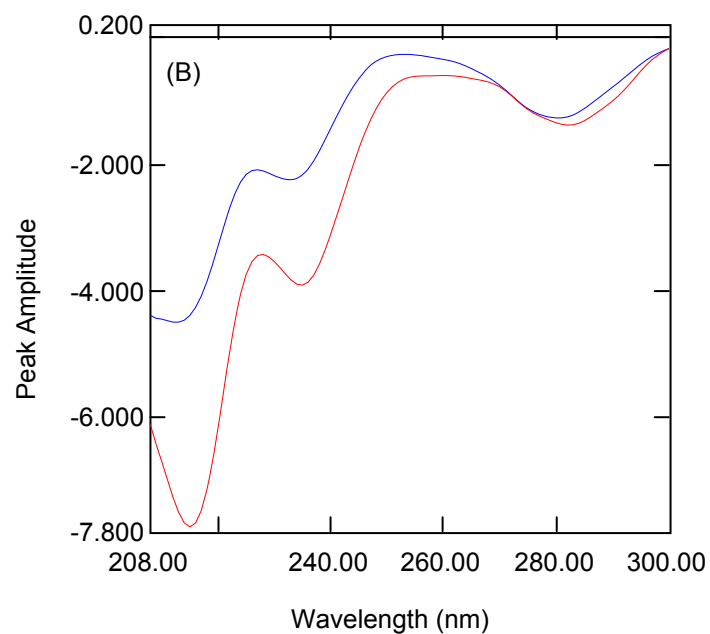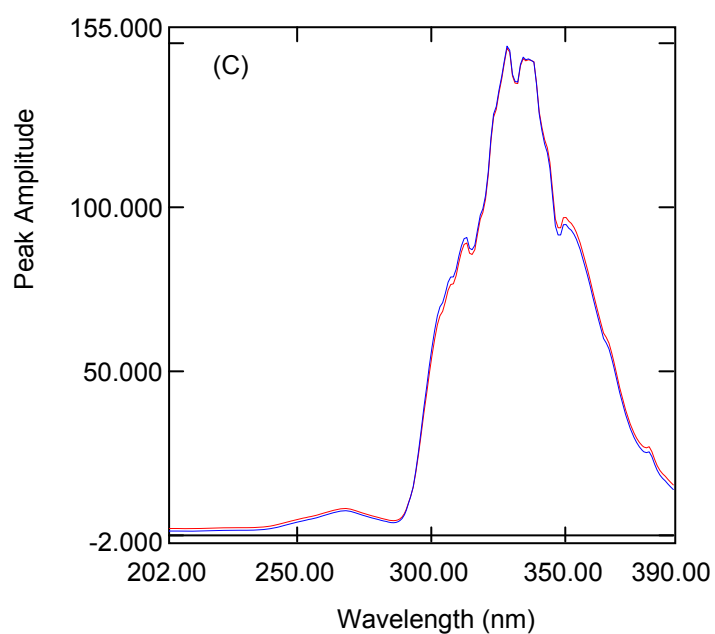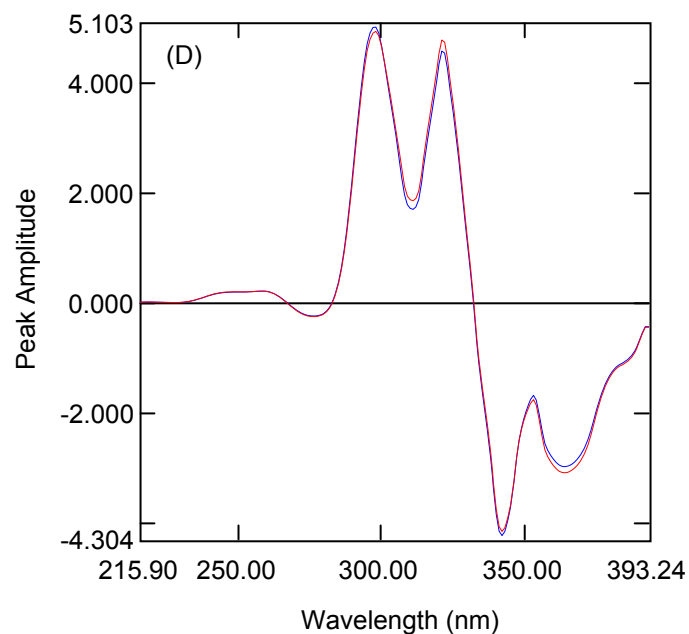

Figure S1. Normal UV spectra of formulation (A), first derivative spectra (B), ratio spectra of AZE (C) First derivative of ratio spectra of AZE (D)

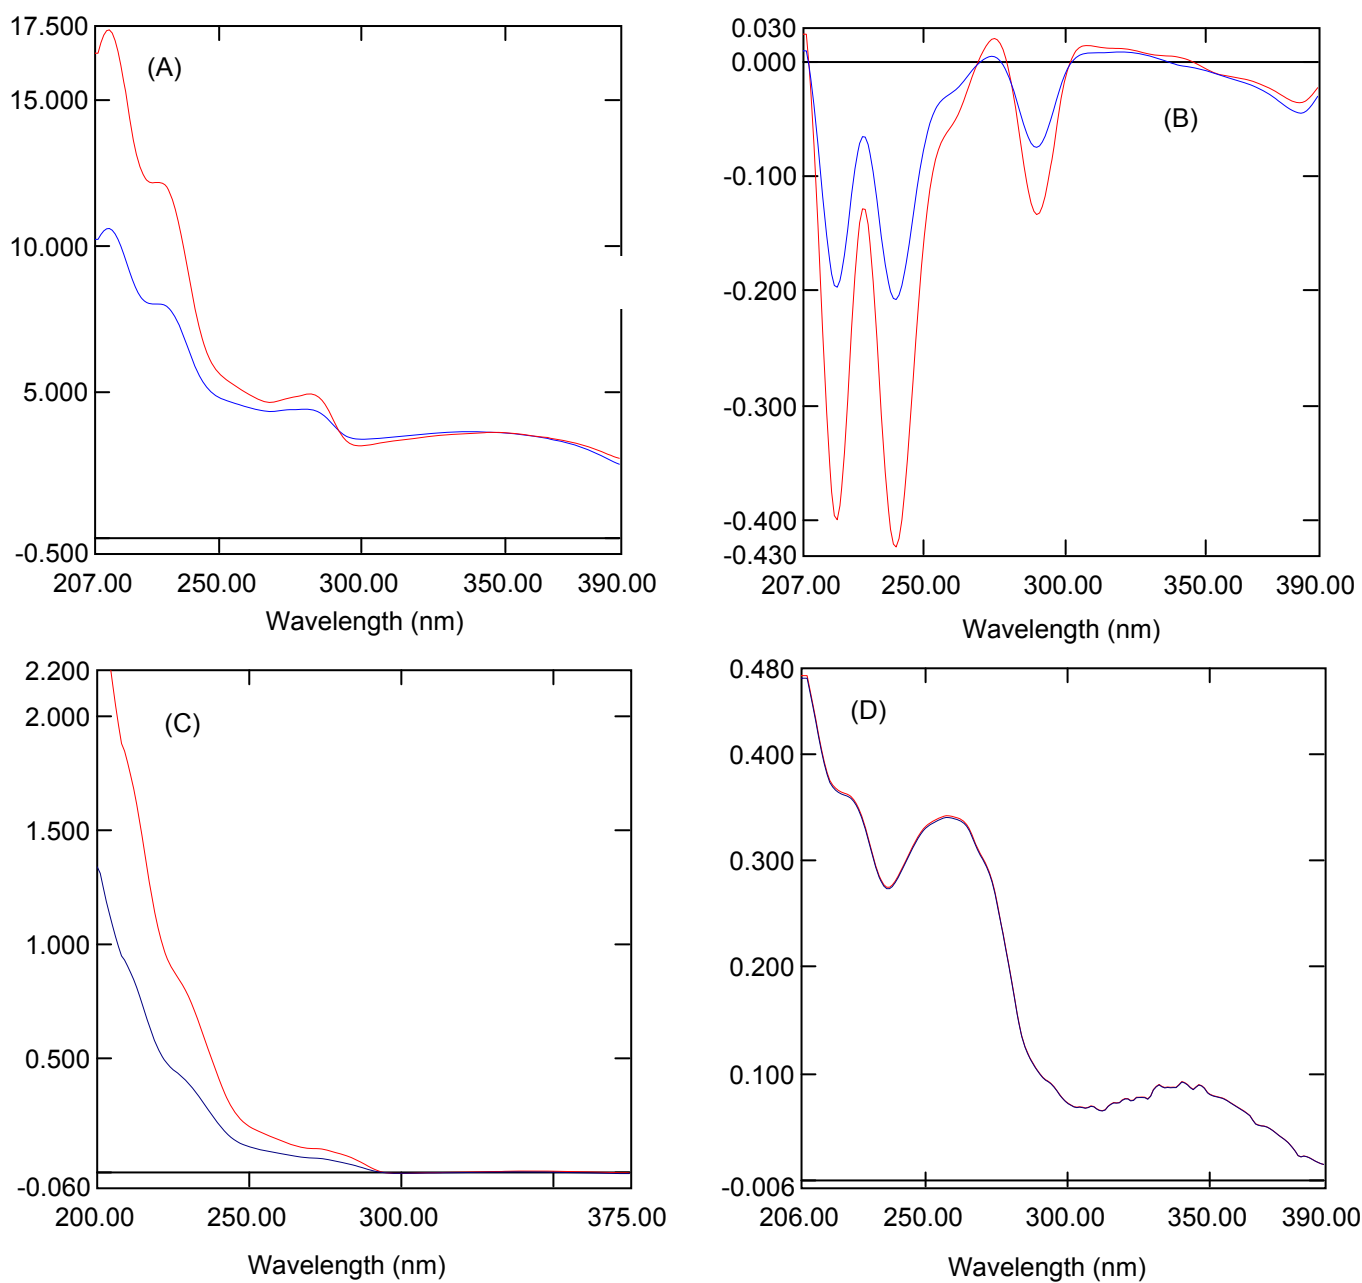

Figure S2 : Ratio spectra of CTL (A), First derivative of ratio spectra of CTL (B), Zero order spectra of CTL (C) and AZE (D)

## Figure S3: Analytical Greenness report sheet

18/02/2022 12:10:45

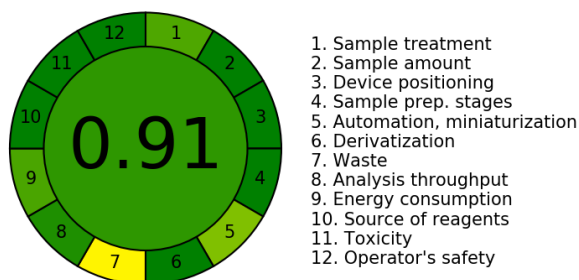

| Criteria                                                                                                                             | Score | Weight |
|--------------------------------------------------------------------------------------------------------------------------------------|-------|--------|
| 1. Direct analytical techniques should be applied to avoid sample treatment.                                                         | 0.85  | 2      |
| 2. Minimal sample size and minimal number of samples are goals.                                                                      | 1.0   | 2      |
| 3. If possible, measurements should be performed in situ.                                                                            | 1.0   | 2      |
| 4. Integration of analytical processes and operations saves energy and reduces the use of reagents.                                  | 1.0   | 2      |
| 5. Automated and miniaturized methods should be selected.                                                                            | 0.75  | 2      |
| 6. Derivatization should be avoided.                                                                                                 | 1.0   | 2      |
| 7. Generation of a large volume of analytical waste should be avoided, and proper management of analytical waste should be provided. | 0.48  | 2      |
| 8. Multi-analyte or multi-parameter methods are preferred versus methods using one analyte at a time.                                | 0.94  | 2      |
| 9. The use of energy should be minimized.                                                                                            | 0.86  | 2      |
| 10. Reagents obtained from renewable sources should be preferred.                                                                    | 1.0   | 2      |
| 11. Toxic reagents should be eliminated or replaced.                                                                                 | 1.0   | 2      |
| 12. Operator's safety should be increased.                                                                                           | 1.0   | 2      |

File


**GDANSK UNIVERSITY  
OF TECHNOLOGY**

# ComplexGAPI

Green Analytical  
Procedure Index

### SAMPLE PREPARATION AND ANALYSIS

#### Sample preparation

1. Collection: In-line ▼

2. Preservation: None ▼

3. Transport: None ▼

4. Storage: None ▼

5. Type of method: No sample preparation ▼

6. Scale of extraction: Nano-extraction ▼

7. Solvents/reagents used: Green solvents/reagent ▼

8. Additional treatments: None ▼

#### Reagents and solvents

9. Amount: < 10 mL (< 10 g) ▼

10. Health hazard: Slightly toxic, slight irri ▼

11. Safety hazard: Highest NFPA flammal ▼

#### instrumentation

12. Energy: <= 0.1 kWh per sample ▼

13. Occupational hazard: Hermetic sealing of th ▼

14. Waste: 1-10 mL (1-10 g) ▼

15. Waste treatment: Degradation, passivatic ▼

#### Method type

Type of analysis: Qualitative and quantit ▼

### PRE-ANALYSIS PROCESSES

#### Yield and conditions

I. Yield: > 89% ▼

II. Temperature/time: Room temp., < 1 h ▼

#### Relation to Green Economy

III. Number of rules met: 5-6 ▼

#### Reagents and solvents

IVa. Health hazard: Slightly toxic, slight irri ▼

IVb. Safety hazard: Highest NFPA flammal ▼

#### Instrumentation

Va. Technical setup: Common setup ▼

Vb. Energy: ≤0.1 kWh per sample ▼

Vc. Occupational hazard: Hermetization of analy ▼

#### Workup and purification

VIa. End products workup, purification: None or simple proces ▼

VIb. Purity: > 98% ▼

#### E-factor

VII. E-factor input: 0.1



1.0E-01

**Figure S4: ComplexGAPI for spectroscopic method**

#### Reference

1. J. Płotka-Wasyłka, and W. Wojnowski, “Complementary green analytical procedure index (ComplexGAPI) and software,” *Green Chemistry*, vol. 23, pp. 8657-8665, 2021. (A compiled, stand-alone version is currently available for Windows and can be downloaded from <http://mostwiedzy.pl/complexgapi>)

| RED<br>PRINCIPLES<br>(analytical<br>performance) |                  |                            | R1: Scope of<br>application | R2: LOD and LOQ |                |       | R3: Precision           |                           |       | R4: Accuracy          |              |       |
|--------------------------------------------------|------------------|----------------------------|-----------------------------|-----------------|----------------|-------|-------------------------|---------------------------|-------|-----------------------|--------------|-------|
|                                                  | Method<br>number | Method name                | 0-100                       | LOD             | LOQ            | 0-100 | RSD%<br>(repeatability) | RSD%<br>(reproducibility) | 0-100 | Relative<br>error (%) | Recovery (%) | 0-100 |
|                                                  | 1                | UV spectroscopic<br>method | 95                          | 0.128-<br>0.328 | 0.38-<br>0.997 | 95    | 0.397-1.803             | 0.893-1.758               | 100   | 0.924-1.607           | 98.37%10.38% | 100   |

| GREEN<br>PRINCIPLES<br>(green<br>chemistry) |                  |                            | G1: Toxicity of reagents (impact<br>and biodegradation) |       | G2: Amount of reagents and waste |                     |       | G3:<br>Consumption of<br>energy and<br>other media | G4: Direct impacts (safety, use of animals and GMOs) |                            |                                       |                                      |
|---------------------------------------------|------------------|----------------------------|---------------------------------------------------------|-------|----------------------------------|---------------------|-------|----------------------------------------------------|------------------------------------------------------|----------------------------|---------------------------------------|--------------------------------------|
|                                             | Method<br>number | Method name                | Total number of<br>pictograms                           | 0-100 | Reagent<br>consumpt<br>ion       | Waste<br>production | 0-100 | 1-100                                              | Occupational<br>hazards                              | Safety of<br>users (0-100) | Use of animals<br>(0 if no, 1 if yes) | Use of GMO<br>(0 if no, 1 if<br>yes) |
|                                             | 1                | UV spectroscopic<br>method | Safe and<br>biodegradable                               | 95    | less than<br>10ml                | Less than<br>10 ml  | 95    | 95                                                 | Not Hazardus                                         | 100                        | 0                                     | 0                                    |

| BLUE<br>PRINCIPLES<br>(practical<br>side) |                  |                            | B1: Cost-efficiency |       | B2: Time-efficiency    |       | B3: Requirements      |                                   |                                                                        | B4: Operational simplicity  |                                           |                         |
|-------------------------------------------|------------------|----------------------------|---------------------|-------|------------------------|-------|-----------------------|-----------------------------------|------------------------------------------------------------------------|-----------------------------|-------------------------------------------|-------------------------|
|                                           | Method<br>number | Method name                | Total cost          | 0-100 | Speed of<br>analysis   | 0-100 | Sample<br>consumption | Sample<br>consumption (0-<br>100) | Other needs:<br>advanced<br>instruments, skills,<br>facilities (0-100) | Miniaturizati<br>on (0-100) | Integration and<br>automation (0-<br>100) | Portability (0-<br>100) |
|                                           | 1                | UV spectroscopic<br>method | 5 USD per sample    | 100   | 50<br>samples<br>/hour | 100   | in micrograms         | 100                               | 100                                                                    | 95                          | 95                                        | 95                      |

| Method<br>number | Method name                | R (%) | G (%) | B (%) | Whiteness<br>(%) |
|------------------|----------------------------|-------|-------|-------|------------------|
| 1                | UV spectroscopic<br>method | 97.5  | 96.3  | 98.8  | 97.5             |

Table S1. White analytical chemistry Evaluation

**Reference:** P. M. Nowa, and P. Kościelniak, “What Color Is Your Method? Adaptation of the RGB Additive Color Model to Analytical Method Evaluation,” *Analytical Chemistry*, vol. 91, no. 16, pp. 10343-10352, 2019. DOI: 10.1021/acs.analchem.9b01872. The excel is available for download from the <https://pubs.acs.org/doi/pdf/10.1021/acs.analchem.9b01872>
